# Supplementary material for: DSM: Deep Sequential Model for Complete Neuronal Morphology Representation and Feature Extraction
Source: Research Square preprint supplement (doi:10.21203/rs.3.rs-1627621/v1), 2022-06-29
Supplement: Supplementary file 1 [file 01ee016b93504e02e4e0a3d1.xlsx]

## Sheet: BrainRegion_embeddings
region	Word2Vec embeddings
CP	[ 1.6366185 0.20156738 2.722534 -0.9285558 -1.186767 0.07771809]
SSp-bfd	[ 4.081847 0.3950881 3.128368 -2.8779643 0.568319 -0.8652911]
SSp-m	[ 4.9989047 -0.49144986 2.8686543 -2.257289 -1.3138838 -0.8665887 ]
SSs	[ 4.052814 -1.1870259 0.799307 -2.87953 -0.9745656 -1.3649253]
fiber_tracts	[ 0.36343464 0.6814189 1.91317 -0.5150585 0.5286512 0.63262755]
VPM	[ 1.5897628 -0.27394703 0.32480758 -2.7971845 1.0443828 1.1188759 ]
SSp-n	[ 4.358072 0.4893338 2.8346736 -2.7359693 0.35972384 -0.59067357]
VISp	[ 3.4298964 5.231289 5.730312 -3.4790928 3.3718097 -2.9234872]
MOp	[ 4.648404 0.1213989 2.9091723 -1.2581377 -0.58083355 -1.699623 ]
SSp-ul	[10.356069 1.9911494 10.7132 -5.9138546 1.5460732 -4.2437196]
unknow	[-0.44892985 0.8887644 2.1807268 -1.6207383 1.3316276 0.3441888 ]
VPL	[ 2.1733866 0.6598983 0.3106964 -2.1950057 1.1411747 1.966896 ]
MOs	[ 5.2663617 0.5373901 1.916637 -0.50340587 0.4377578 -1.9948426 ]
GPe	[ 0.95863694 1.0904356 3.1150608 -1.8086616 -0.50107765 1.4444945 ]
AUDp	[ 1.9657023 0.04494293 3.038277 -6.3182487 4.4307384 -8.430604 ]
SNr	[-0.05892046 2.7396164 2.6388133 -1.4374539 1.4701662 -0.12762062]
RT	[ 1.5031894 -0.7294296 1.1059809 -1.6025561 1.6840512 1.3064884]
SSp-un	[ 6.2125173 1.3419397 6.1764293 -5.076526 1.0015355 -1.4327139]
SSp-ll	[ 8.946993 3.5366364 10.725525 -6.383525 2.2999136 -5.2337046]
LGd	[ 0.16585474 -0.23141107 2.8750503 -1.32539 2.9932168 -3.5244923 ]
SSp-tr	[ 4.671497 3.234516 7.3897533 -4.3992953 1.8283613 -3.758492 ]
VISC	[ 3.4227443 -1.1603845 1.6256567 -3.2140355 -2.1519785 -1.703008 ]
AUDd	[ 4.8082824 -0.02172276 4.2903285 -6.6758714 4.546813 -5.6678367 ]
AUDv	[ 1.8277407 -1.2612635 2.317446 -3.9579067 1.4989927 -5.056438 ]
PO	[ 1.8213198 -1.3652732 0.48513615 -3.0523784 2.1699498 0.9745061 ]
MG	[-1.0834807 1.9053707 0.83142084 -3.527587 2.2472417 -1.9947435 ]
GU	[ 4.076523 -1.1613157 2.2859223 -1.4297539 -2.4867263 -1.774533 ]
TEa	[ 0.5405193 -0.37898687 2.101903 -4.1560073 0.54641306 -4.177573 ]
ZI	[-0.18320432 2.3365712 1.774936 -2.9331405 1.1137147 0.5846888 ]
VISa	[ 6.175351 4.413341 8.892198 -6.163904 3.3726823 -3.9277606]
RSPagl	[ 5.509126 3.9658957 7.453909 -5.2374253 -0.68119013 -3.983245 ]
MRN	[ 0.28707522 0.63740736 0.28984872 -3.5298438 3.0398555 -0.75655466]
VAL	[ 2.471505 0.11083749 0.5402227 -3.9277668 -0.03089277 1.699186 ]
VISrl	[ 5.433843 4.370294 9.242501 -6.8659596 4.6114078 -3.971013 ]
GPi	[ 1.2964193 1.6063893 3.2742853 -1.533019 0.06251062 1.8323956 ]
PG	[ 3.419772 1.2660979 0.2201465 -0.56701523 3.078378 1.0673324 ]
VM	[ 1.0597423 1.4729229 0.94303054 -4.8421183 -0.35360414 0.95944375]
CLA	[ 3.7402928 2.0172033 2.1066873 -0.98825854 -2.3821847 -0.5126291 ]
AId	[ 4.758475 1.1321383 2.4717815 0.5097628 -0.97318625 -0.60799617]
VISpm	[ 5.9425836 4.2442894 9.102203 -4.6174207 0.11473219 -3.7778 ]
PF	[ 0.78711486 -1.6994264 0.744517 -3.3133364 2.2222323 -0.5047637 ]
RSPd	[ 5.8843923 3.5653636 8.036794 -5.3451724 -0.02885892 -5.230563 ]
SCm	[ 1.201154 0.24799308 -0.39127338 -4.723781 3.805207 -1.7706383 ]
APN	[-0.08918823 1.1186072 0.07229535 -3.9710708 1.9206234 -0.68496466]
TRN	[ 2.8431942 1.2463791 0.84057647 0.3576113 3.2391517 -0.07141451]
SI	[ 0.47224864 2.1272197 4.3884754 -0.35110295 -0.10449726 -0.2072733 ]
VPMpc	[ 0.52995574 -0.15116711 1.9900148 -4.8926854 0.36502373 0.18153545]
AUDpo	[ 3.6911983 1.9724044 5.866777 -6.4600244 4.488579 -7.938821 ]
CEA	[ 0.454125 1.8681877 4.167382 -1.0059763 -1.0578314 -0.41003495]
VISl	[ 3.6769507 3.1443176 7.0957985 -4.3263774 3.6374817 -3.7486475]
SNc	[-0.20684956 3.8344471 2.6170683 -1.7274524 2.5598404 -0.8807339 ]
EPd	[ 0.451583 1.3198557 2.6319926 -2.0372057 -1.5482389 -1.7859738]
ORBl	[ 2.6975143 2.4138358 2.459263 0.05056176 0.95965934 -1.7821312 ]
ECT	[-0.1246983 0.29681018 2.7252896 -3.5739744 -0.2653341 -3.8930671 ]
VISpl	[ 4.7509036 2.574255 6.254521 -5.5827603 -0.374914 -3.8725648]
LGv	[-1.0357758 -0.3312833 1.8141862 -1.7648697 2.3406289 -1.7803357]
AIp	[ 2.5061085 0.2514037 1.7683821 -2.7856576 -2.591089 -1.4546448]
ACAd	[ 3.2321303 0.8374723 4.7236123 -3.30607 2.427554 -4.833935 ]
PRNr	[ 1.6041218 2.0189822 1.0325285 -0.57367873 4.2766943 -1.4347584 ]
VPLpc	[ 0.15908788 0.18956028 2.4255345 -3.7231233 0.12645926 0.25665417]
STN	[ 0.12152197 3.1766346 2.4168885 -2.2927294 0.47860378 0.43893227]
PCN	[ 1.710714 -1.6779826 0.931634 -4.015749 0.41756248 0.52532625]
CA3	[-0.02783777 0.24305873 2.8336427 -0.6178121 3.672854 -1.3105974 ]
VISpor	[ 1.4760079 0.74445575 2.4761124 -6.520516 -0.01032081 -5.4329567 ]
IGL	[-0.6786193 0.04324243 2.3888464 -2.058256 3.146364 -3.1684906 ]
DG	[ 0.38515994 2.2676215 2.268626 -1.2306656 3.7397766 -3.6264083 ]
PAG	[ 1.0610517 0.73067933 0.10521621 -3.646303 4.7457905 -0.6689178 ]
MEA	[ 0.48616242 2.782217 3.4239025 -1.177673 -0.29549992 -0.1826837 ]
LP	[ 0.16443898 -1.7346963 1.3309681 -2.618867 3.7566552 -3.0769787 ]
SPVC	[ 4.473952 -2.9023943 4.612175 1.8174505 3.6737237 -3.7063632]
PoT	[-0.21048804 0.07732637 1.8966935 -3.1229868 2.0782626 -0.15198712]
FS	[ 0.5584442 1.4217131 4.257591 0.09563375 -0.70140517 -1.3812976 ]
SPVI	[ 7.0936027 -3.1924984 4.2845416 1.308169 2.319837 -3.2651305]
LA	[-1.0498291 -0.02140895 2.3187573 -3.075835 -0.32788602 -2.5844648 ]
ACAv	[ 4.747948 1.4840764 6.316882 -4.1691446 1.2943087 -1.0880423]
VISal	[ 2.9082396 2.673043 5.698746 -3.7212713 2.6526883 -2.8483663]
ENTl	[ 1.6275685 2.423383 2.8061724 -5.5369806 -0.24132563 -5.023677 ]
MD	[ 1.8865373 -2.2888088 1.3276381 -3.8678145 0.3573497 -0.05221865]
GRN	[ 5.516342 -0.59380186 2.093317 1.3818841 4.252217 -0.66912645]
SPVO	[ 7.3461866 -3.2709248 3.573464 0.25109524 2.7898195 -3.7105012 ]
ACB	[ 1.0990739 4.5164614 5.693 -0.13629141 0.34419107 -3.7076716 ]
IntG	[-0.66943735 1.2475971 1.0676242 -2.779082 2.954501 -1.8147008 ]
PARN	[ 5.539019 -1.7367796 3.2428849 1.1004032 3.303101 -3.3176951]
SPFp	[-0.6479899 0.66807 1.9503812 -3.6207056 1.413698 -0.37337467]
VISam	[ 3.9125376 1.9821632 5.147464 -3.6273172 0.94740254 -2.8141255 ]
AIv	[ 2.3719566 2.368187 1.6173952 -0.4488859 -0.74886113 -0.787376 ]
LD	[ 2.2111306 -2.7876246 0.57030684 -2.0529604 1.678553 -0.9034824 ]
PERI	[ 1.3827103 1.9045305 2.4701362 -5.1126175 -0.49813068 -3.9786096 ]
SGN	[-0.89332694 0.9477136 1.1381981 -4.711834 3.7233396 -3.618111 ]
VCO	[ 2.8633006 -0.22179624 3.8774467 -0.550259 3.330268 -5.671479 ]
PIL	[-1.6117697 1.7205732 2.460222 -2.7594633 2.8573618 -2.215984 ]
MARN	[ 4.023091 -1.6326057 1.7484384 1.0189068 4.242779 -0.8987323]
RN	[ 0.44891787 1.9501036 -0.04525713 -4.4735065 3.242404 -0.3149264 ]
IRN	[ 5.282229 -0.52020663 2.9319196 1.5388604 3.9208388 -2.7834382 ]
PRNc	[ 4.3874955 1.0114005 1.3679929 0.23702635 5.545262 -1.5841409 ]
VTA	[ 0.41357544 3.207431 1.1863269 -1.8896681 2.3774304 -0.30622524]
VISli	[ 2.1319087 1.0891312 4.0689673 -3.204535 2.0828636 -2.9389222]
CL	[ 1.3513426 -2.5769224 0.55643016 -2.3623314 1.764554 -0.41012293]
POL	[-0.5418077 -0.10350012 0.57095444 -3.7230093 2.410969 -1.4316642 ]
PL	[ 1.755494 1.3085182 3.8091948 -2.3738937 2.768899 -2.8401306]
MDRNv	[ 5.055385 -0.25419587 3.738033 2.2411697 3.1355686 -2.675983 ]
RSPv	[ 2.002785 1.6374305 3.6913235 -3.205668 3.2394156 -1.7322141]
NTB	[ 2.5992277 -0.17121741 1.1653756 -0.10498905 4.6101613 -1.1362065 ]
MDRNd	[ 4.404228 -1.2433169 3.6942081 1.616856 2.267108 -3.2892327]
ILA	[ 2.6926522 1.8185036 4.110759 -2.1432421 3.9006746 0.29324755]
SMT	[ 1.4618595 0.46591648 0.8817204 -5.1082892 -1.3466514 0.7033321 ]
VII	[ 5.3613315 -0.20602877 1.9419957 0.604969 4.7629046 -2.3409672 ]
LHA	[ 0.33485246 2.5089061 1.9067663 -0.6646871 0.6325438 -0.2611273 ]
PP	[-1.4505082 1.6621168 3.06101 -1.7353464 2.7040558 -2.2879083]
LT	[-0.635497 1.0812072 2.7191403 -1.5660225 1.8615316 -0.38272175]
CA1	[ 0.25669572 -1.4175724 1.544212 -0.991588 1.6023247 -1.0181631 ]
AON	[ 1.1187228 2.7030382 4.5968866 -2.5149043 2.9015045 -2.3974457]
FRP	[ 1.3167573 1.6511511 3.2402081 -1.822604 3.2172055 -1.7755735]
IO	[ 3.533555 -0.678079 2.5023744 1.8768982 2.185023 -0.91807294]
PB	[ 1.2289808 0.50794446 1.8000386 0.34002727 4.26381 -2.3197565 ]
MA3	[-0.5806306 0.7201248 1.7278237 -2.79156 2.202002 -0.04406847]
CM	[ 2.045973 -2.0986922 1.6521724 -4.431391 -1.2457292 0.19477181]
IG	[ 1.8102945 0.40768966 1.5314864 -1.6790912 0.827457 -0.77414656]
ENTm	[ 2.142253 1.7122701 0.7070528 -6.309153 -0.70057225 -2.9439027 ]
PSV	[ 1.8144684 0.34890702 2.1904018 0.2826158 2.615769 -3.0302987 ]
PPY	[ 2.548187 -0.49625048 1.3747313 0.1934914 4.58519 -1.1069169 ]
NLL	[ 0.6403235 0.07072487 1.6119773 0.3713044 3.1807785 -1.2806847 ]
RM	[ 3.3854103 -1.3671925 1.5413793 1.0630641 3.369923 -0.6769014]
ORBvl	[ 1.9914213 2.282531 2.8676624 -1.9338034 3.7789857 -0.89935076]
SOC	[ 1.8427094 0.455573 0.8994215 -0.2785432 4.212399 -1.4082519]
NTS	[ 4.518675 -1.1931046 3.7930982 1.2155278 1.1351154 -3.4286659]
ORBm	[ 1.3198764 2.188857 4.0567245 -1.3419456 2.8961446 -0.9887258]
EPv	[ 0.10934958 1.1858764 3.5532892 -0.9304926 -1.3444947 -0.12101046]
SCs	[ 1.6597108 -0.7910089 -0.28647718 -3.737474 2.719427 -1.6489484 ]
MV	[ 3.375281 0.8831753 3.138452 2.1305888 3.2392585 -1.933704 ]
RPA	[ 2.3820426 -0.83898216 1.4242966 0.91580933 2.8413985 -1.0823251 ]
MT	[-0.18004596 3.6077056 2.8967657 -1.9211453 2.18302 -0.8779326 ]
PPN	[ 0.6385485 0.37644252 0.8578774 -0.8022988 4.018789 -1.520218 ]
NPC	[ 1.0486971 -1.765569 -0.15408365 -2.8235395 2.85969 -0.82425106]
PGRNl	[ 5.068791 -1.0830581 2.1756144 1.6202463 3.28202 -0.8353766]
RR	[ 0.34330693 1.0348946 0.23343489 -2.4728782 3.5963976 -0.7095887 ]
LSc	[-0.7660469 0.48055977 4.3304 -1.2589749 -0.16200887 -1.5743408 ]
IC	[ 2.4240160e+00 -1.9786963e+00 -2.7473257e-03 -2.7449894e+00
	3.7789142e+00 -4.4078633e-01]
POST	[ 0.4193723 0.7632807 -0.37616798 -2.5284822 1.0943589 -1.05119 ]
PSTN	[ 0.29593137 4.1896935 2.021825 -2.5421522 1.700424 -0.54009044]
CU	[ 2.736449 -0.8786065 3.0261416 1.5023812 2.031793 -2.5907242]
DP	[ 1.8896074 1.5774637 3.1008105 -1.4843978 3.1315207 0.23527004]
NR	[ 4.8362684 0.402182 2.9497626 2.3736758 1.7939687 -1.2398067]
PIR	[ 2.702108 2.523419 2.525974 -1.7531278 -1.3257884 -2.5836163]
EW	[-0.37882498 0.22423954 1.7953863 -2.7194057 2.2242851 0.1974677 ]
SPFm	[-0.34441224 -0.34738135 2.0437002 -3.0638251 2.2123106 -0.28943533]
PGRNd	[ 2.9466035 0.2922638 1.4151052 1.165582 2.7885575 -0.70430326]
APr	[ 1.9726013 1.6270823 2.9661992 -1.9550389 2.2864203 -1.9672173]
RE	[ 1.3261554e+00 -2.3087689e-03 2.0723205e+00 -3.8488026e+00
	-5.2199997e-03 1.3677448e+00]
SAG	[ 1.1802094 -0.79186904 0.6199043 -2.2200973 4.6210804 -0.8802794 ]
IPN	[-0.36584002 1.3893491 2.6624978 -0.23790684 3.126973 -1.2464308 ]
P5	[ 1.0796136 0.18322353 0.8028624 -0.27516618 3.3770616 -1.5151895 ]
CS	[ 1.5471481 -0.9056304 0.760245 -0.27365935 3.8900237 -1.1320211 ]
RH	[ 2.4085505 -1.4263812 1.2390689 -4.4879537 0.03336456 1.0840273 ]
SubG	[-0.7621186 0.3175153 0.721075 -1.8459815 1.1733844 -0.9450601]
LRN	[ 2.8723137 0.55191666 1.8821084 1.7331036 2.2993805 -0.99831384]
PH	[-0.05406799 0.7949464 1.6338892 -2.767963 1.1519184 0.62894684]
SUT	[ 0.92554843 -0.22680797 0.8038577 -0.927115 4.13843 -1.5768862 ]
XII	[ 3.8460317 0.54391295 2.5774238 1.9919717 1.5736438 -1.1312418 ]
PBG	[-0.52610046 0.17297257 0.8403292 -2.021146 2.8311071 -2.1415598 ]
ProS	[ 2.3584948 -2.062907 0.7245358 -1.473655 1.3379061 -0.14002676]
SF	[-1.1319171 0.68298835 4.0477953 -1.2879537 0.1893476 -1.4903055 ]
IA	[-0.08300774 1.5436542 2.7100523 -0.8542321 -0.7920046 -0.28948838]
SLD	[ 1.4572322 -0.34240252 0.38796115 -0.30607596 3.0121367 -0.8201752 ]
BLA	[ 0.08129618 -0.29875493 0.9161907 -3.8369293 0.37023214 -1.8720167 ]
ECU	[ 2.3967698 -1.3930174 2.911504 1.44341 1.3394235 -1.869054 ]
LPO	[-0.02210557 2.093639 2.8228414 -0.8594587 0.14982861 -0.5218587 ]
LIN	[ 3.4057727 -0.60349596 2.3162527 1.5188903 1.2202865 -1.3742937 ]
CA2	[ 0.37597108 -0.56287277 1.6540632 -1.1956439 1.6004357 -0.07624508]
AMB	[ 3.5039527 -0.5131505 2.1797352 1.7459136 1.4778517 -1.1068296]
SUB	[ 2.3242822 -2.2477741 0.94960415 -1.6345308 1.0115315 -0.18375705]
PST	[ 1.6121058 2.0128632 -0.2705163 -1.5747815 3.3919792 -1.1054364]
AV	[ 1.5802066 -2.5711706 0.8386575 -1.4018956 0.71476716 -0.6317222 ]
RPO	[ 2.0111623 -1.58476 1.150646 0.29452 2.9884036 -0.7918803]
I5	[ 2.0439112 0.1286569 2.0567818 1.0743351 1.912026 -2.0892751]
V	[ 1.8493402 0.18680194 2.021773 0.9802827 1.8331037 -2.094078 ]
SLC	[ 1.7015566 -0.7313495 0.47585827 0.0981859 2.5485532 -0.4798116 ]
CUN	[ 0.46036336 -1.139797 0.9005316 -1.5572691 2.0341494 0.28883576]
PAR	[ 0.9935208 0.5295922 0.3996463 -3.1426713 -0.07054599 -1.6470962 ]
RO	[ 1.6861078 0.45830888 1.7873526 1.3408672 1.0487615 -0.9275482 ]
LSr	[-0.85835755 0.32097903 2.814221 -0.6770683 0.4223926 -0.71112245]
III	[ 0.97296655 -1.3498577 0.5932746 -0.83140165 1.9646624 0.41657186]
DT	[ 0.41508758 -0.99154705 0.19628589 -0.99073714 1.841211 -0.7466935 ]
